# Supplementary material for: Use of ramucirumab for various treatment lines in real-world practice of patients with advanced hepatocellular carcinoma
Source: Research Square preprint supplement (doi:10.21203/rs.3.rs-1768744/v1), 2022-06-24
Supplement: Supplementary file 1 [file 262c976db05424b704dc2fe5.docx]

**Supplementary Table 1.** Adverse events during treatment with ramucirumab in patients with advanced hepatocellular carcinoma.

| **Events** | **All patients (n= 37)** | |
| --- | --- | --- |
| **Any** | **Grade ≥ 3** |
| Hypertension | 20 (54.0%) | 2 (5.4%) |
| Hypoalbuminemia | 15 (40.5%) | 0 |
| Proteinuria | 13 (35.1%) | 1 (2.7%) |
| Increased aspartate aminotransferase | 12 (32.4%) | 0 |
| Edema | 11 (29.7%) | 0 |
| Decreased platelet count | 9 (24.3%) | 0 |
| Anorexia | 8 (21.6%) | 2 (5.4%) |
| Fatigue | 8 (21.6%) | 2 (5.4%) |
| Increased alanine aminotransferase | 7 (18.9%) | 0 |
| Bleeding | 5 (13.5%) | 1 (2.7%) |
| Elevated ammonia | 4 (10.8%) | 0 |
| Diarrhea | 3 (8.1%) | 0 |
| Increased serum amylase | 2 (5.4%) | 0 |
| Anemia | 2 (5.4%) | 0 |
| Blood bilirubin | 2 (5.4%) | 0 |
| Fever | 2 (5.4%) | 0 |
| Infusion reaction | 1 (2.7%) | 0 |
| Weight loss | 1 (2.7%) | 0 |
| Hyperuricemia | 1 (2.7%) | 1 (2.7%) |

**Supplementary Table 2.** Best response, objective response rate, and disease control rate during ramucirumab treatment.

|  | **All patients (n= 37)** |
| --- | --- |
| **RECIST**  Complete response  Partial response  Stable disease  Progressive disease  Objective response rate  Disease control rate | 0  1 (2.7%)  18 (48.6%)  14 (37.8%)  1 (2.7%)  19 (51.4%) |
| **mRECIST**  Complete response  Partial response  Stable disease  Progressive disease  Objective response rate  Disease control rate | 0  7 (19.0%)  11 (29.7%)  13 (35.1%)  7 (19.0%)  17 (45.9%) |

RECIST, Response Evaluation Criteria in Solid Tumors; mRECIST, modified RECIST
